# Supplementary material for: The Influence of Light and Nutrient Starvation on Morphology, Biomass and Lipid Content in Seven Strains of Green Microalgae as a Source of Biodiesel
Source: MDPI journal article supplement (doi:10.3390/microorganisms8081254), 2020-08-18
Supplement: s1 [file s1]

Article

# THE INFLUENCE OF LIGHT AND NUTRIENT STARVATION ON MORPHOLOGY, BIOMASS AND LIPID CONTENT IN SEVEN STRAINS OF GREEN MICROALGAE AS A SOURCE OF BIODIESEL

Lorenza Rugnini <sup>1</sup>, Catia Rossi<sup>1</sup>, Simonetta Antonaroli<sup>2</sup>, Arnold Rakaj<sup>3</sup> and Laura Bruno<sup>1,\*</sup>

<sup>1</sup> LBA-Laboratory of Biology of Algae, Dept. of Biology, University of Rome "Tor Vergata", via Cracovia 1, 00133, Rome, Italy; rgnlnz01@uniroma2.it, laura.bruno@uniroma2.it, catia.red85@gmail.com

<sup>2</sup> Department of Chemical Sciences and Technologies, University of Rome "Tor Vergata", via della Ricerca Scientifica 1, 00133, Rome, Italy; simonetta.antonaroli@uniroma2.it

<sup>3</sup> Laboratory of Experimental Ecology and Aquaculture, Department of Biology, University of Rome "Tor Vergata", via Cracovia 1, 00133, Rome, Italy, arnoldrakaj@gmail.com

\* Correspondence: laura.bruno@uniroma2.it; Tel.: +39 3383784941

| Table of content                                                                                          | Pages |
|-----------------------------------------------------------------------------------------------------------|-------|
| Figure S1- Growth curves of the strains belonging to the genera <i>Scenedesmus</i> and <i>Tetradesmus</i> | 2     |
| Figure S2- Growth curves of the strains belonging to the genera <i>Desmodesmus</i>                        | 3     |

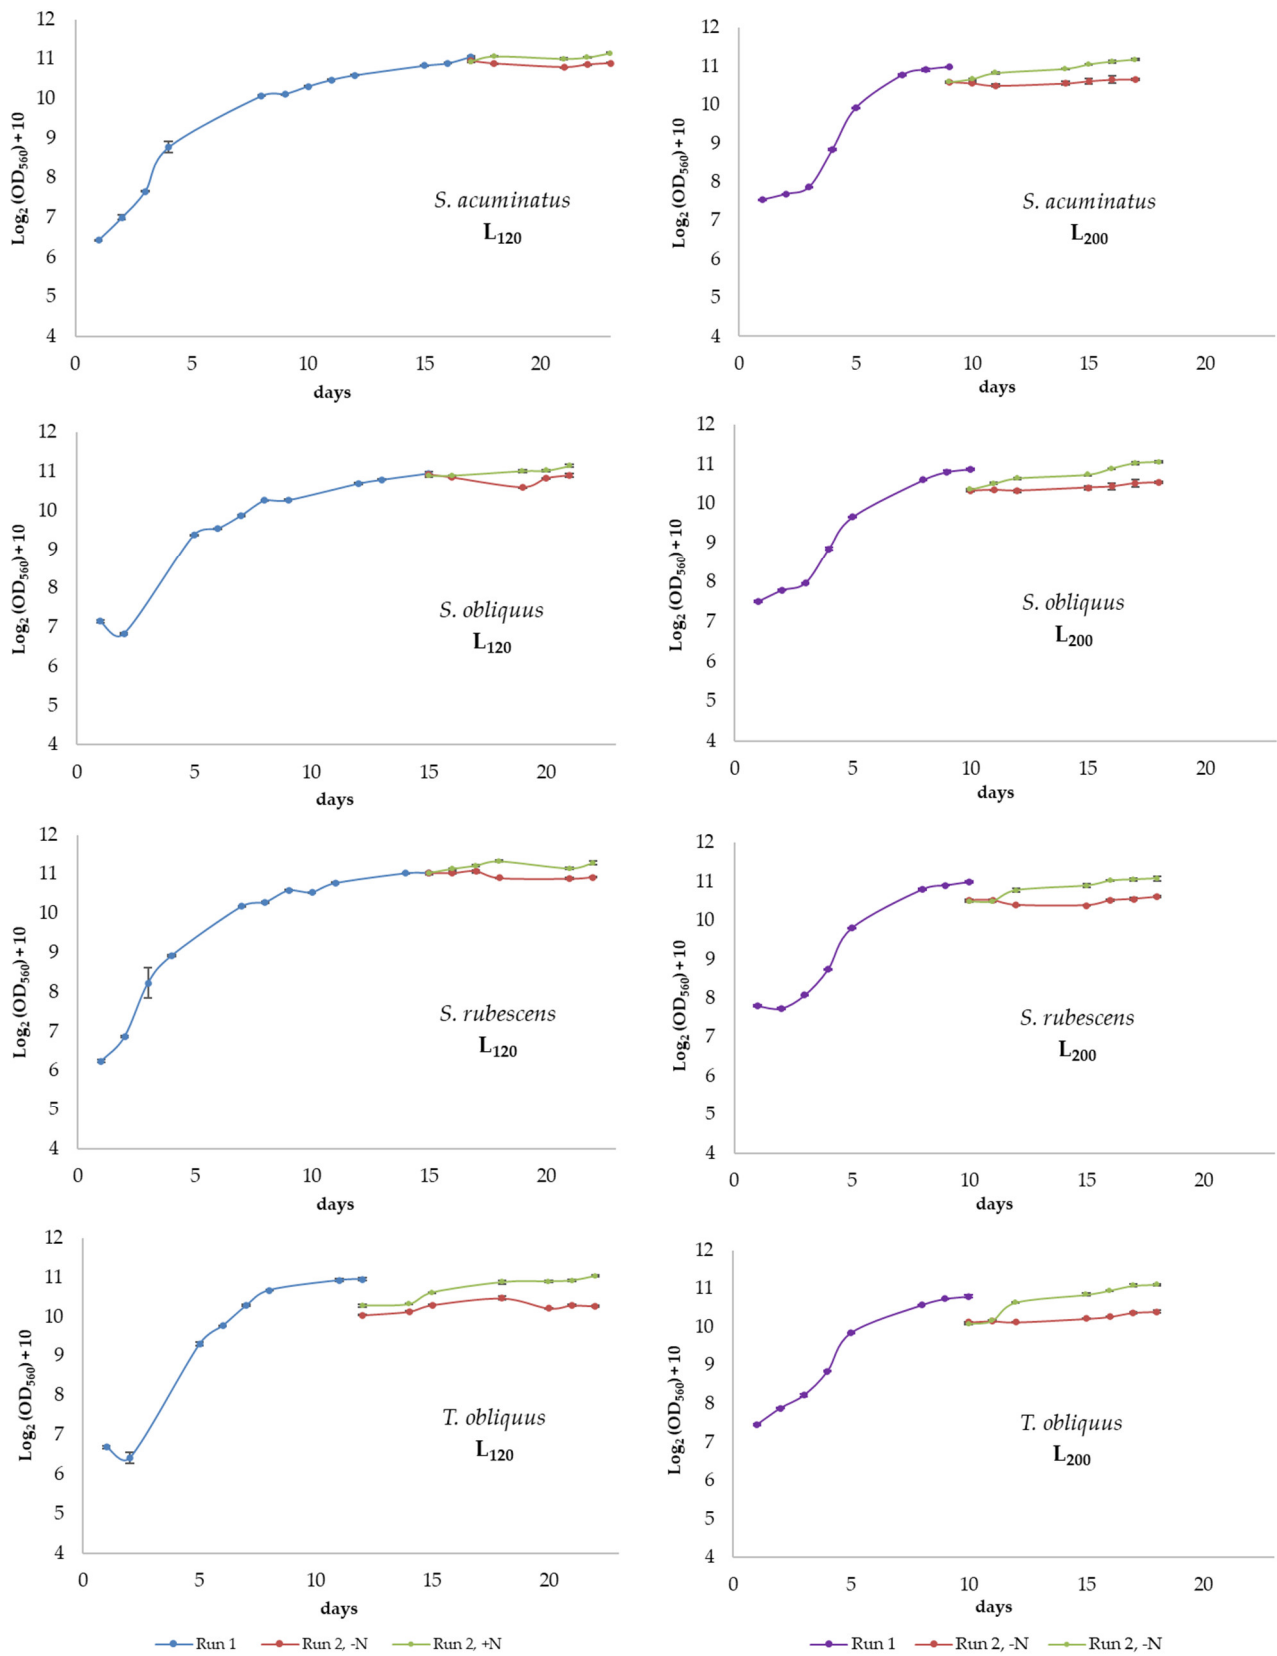

**Figure S1.** Growth curves of *S. acuminatus*, *S. obliquus*, *S. rubescens* and *T. obliquus* at the two different irradiances ( $L_{120}$ : 120  $\mu\text{mol photons m}^{-2} \text{s}^{-1}$ ;  $L_{200}$ : 200  $\mu\text{mol photons m}^{-2} \text{s}^{-1}$ ) as logarithm of OD detected at 560 nm versus time (days). Cultures obtained during run 1, were divided in two sub-culture with (+N) or without (-N) nitrogen for each culture conditions tested in run 2.

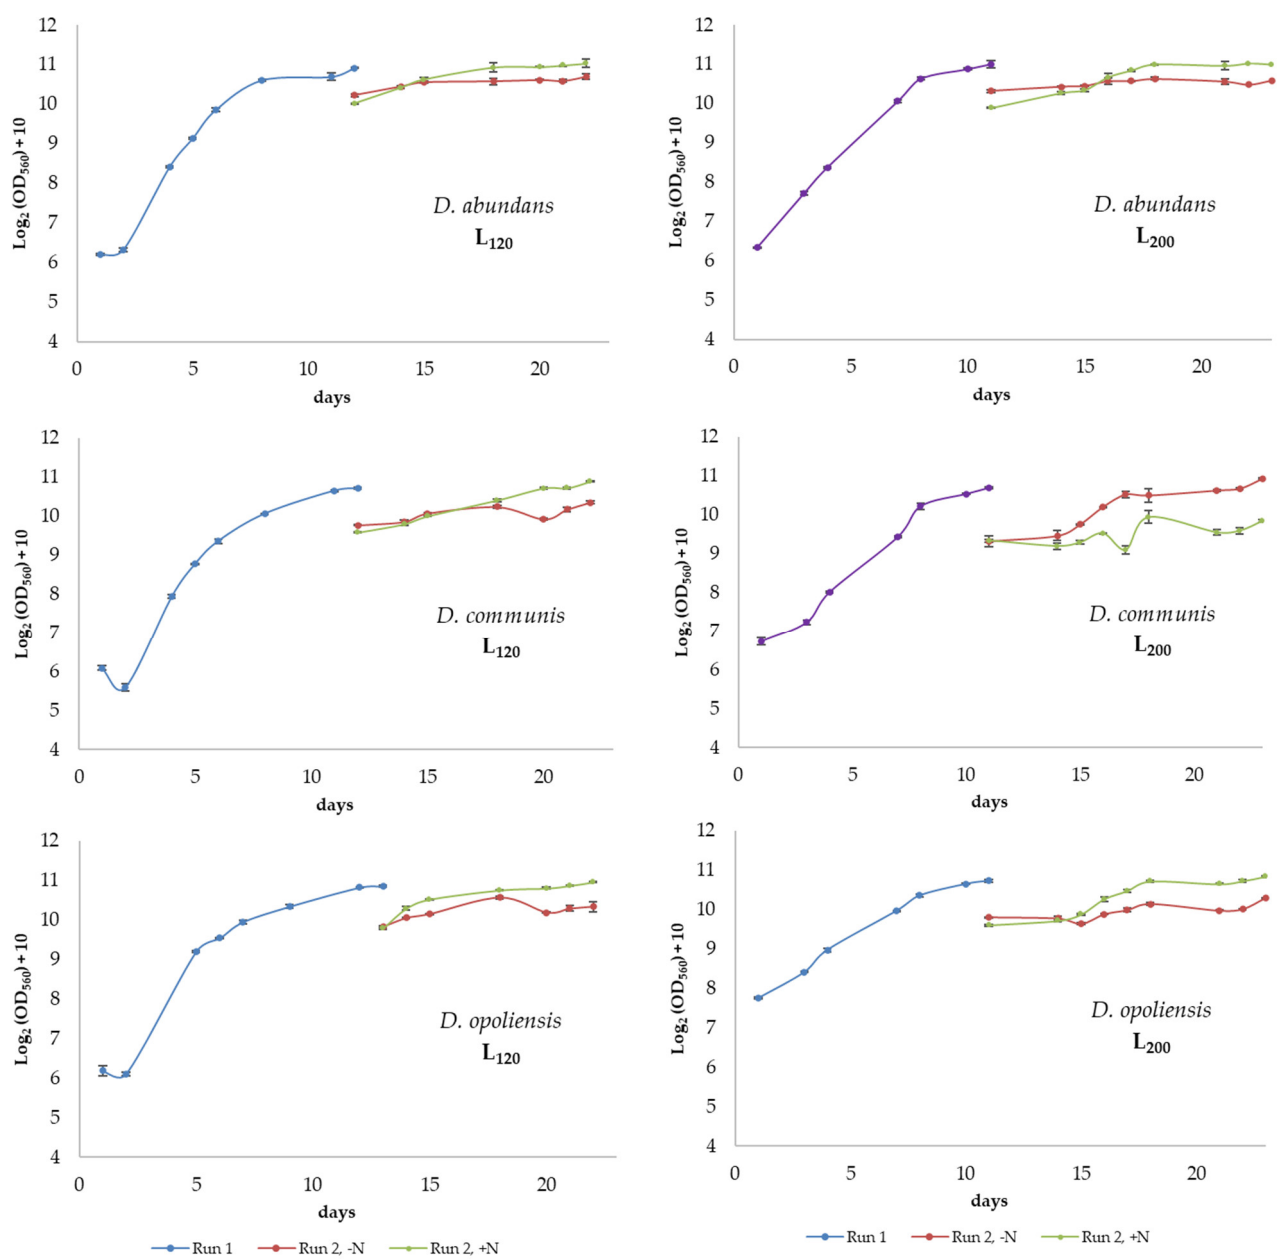

**Figure S2.** Growth curves of *D. abundans*, *D. communis* and *D. opoliensis* grown at the two different irradiance (L120: 120  $\mu\text{mol photons m}^{-2} \text{s}^{-1}$ ; L200: 200  $\mu\text{mol photons m}^{-2} \text{s}^{-1}$ ) as logarithm of OD detected at 560 nm versus time (days). Cultures obtained during run 1, were divided in two sub-culture with (+N) or without (-N) nitrogen for each culture conditions tested in run 2.
